# Supplementary material for: Comorbid Illness, Bowel Preparation, and Logistical Constraints Are Key Reasons for Outpatient Colonoscopy Nonattendance
Source: Can J Gastroenterol Hepatol. 2016 Jul 11;2016:2179354. doi: 10.1155/2016/2179354 (PMC4958479; doi:10.1155/2016/2179354)
Supplement: Supplementary file 1 — The supplemental data provides the questionnaire designed by study investigators to elicit key information from participants via telephone survey. [file 2179354.f1.pdf]

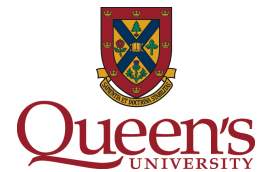

## ***Data Collection Form***

### **Reasons for Colonoscopy Cancellation and Non-Attendance in Kingston, Ontario**

*Patient Name:*

1) How old are you? \_\_\_\_\_ years

- 20-30 years old \_\_\_\_
- 31-50 years old \_\_\_\_
- 51-70 years old \_\_\_\_
- 71-90 years old \_\_\_\_
- 91-110 years old \_\_\_\_

2) Sex: \_\_\_\_\_

3) How far do you live from Hotel Dieu Hospital?

- 1-5 km \_\_\_\_
- 6-10 km \_\_\_\_
- 11-15 km \_\_\_\_
- 16-20 km \_\_\_\_
- >20 km \_\_\_\_

4) Where do you live?

\_\_\_\_\_

5) What was the date of your scheduled colonoscopy? \_\_\_\_\_

6) Was that your first colonoscopy?

- Yes \_\_\_\_\_ No \_\_\_\_\_

7) Did you have an appointment at the clinic before your colonoscopy appointment?

- Yes \_\_\_\_\_ No \_\_\_\_\_
- If yes, when was it?

\_\_\_\_\_

8) Why did you need a colonoscopy?

\_\_\_\_\_

- Screening \_\_\_\_\_ or Symptomatic \_\_\_\_\_

9) What prevented you from attending your colonoscopy?

\_\_\_\_\_

10) Did you reschedule your missed colonoscopy?

- Yes \_\_\_\_\_ No \_\_\_\_\_
- Rescheduled for \_\_\_\_\_

11) Did any of the following reasons affect your ability to attend your colonoscopy?

| Potential Reason for Missed Colonoscopy                          | Yes | No |
|------------------------------------------------------------------|-----|----|
| You were unable to complete your bowel preparation               |     |    |
| You were too sick to attend your colonoscopy                     |     |    |
| Your symptoms were gone                                          |     |    |
| You forgot to attend your colonoscopy                            |     |    |
| You forgot to cancel your appointment                            |     |    |
| You did not have a ride home                                     |     |    |
| You were unable to leave work                                    |     |    |
| You were anxious about the procedure                             |     |    |
| You were afraid of the results of the colonoscopy                |     |    |
| You were concerned about who would be conducting the colonoscopy |     |    |

a) Please rank your top reason from the list above?

Top Reason: \_\_\_\_\_

12) What do you think the medical team could have done to help you keep your colonoscopy appointment?

\_\_\_\_\_
